# Supplementary material for: Large Online Product Catalog Space Indicates High Store Price: Understanding Customers’ Overgeneralization and Illogical Inference
Source: Atypon-hosted journal article supplement (doi:10.1287/isre.2019.0844), 2019-08-29
Supplement: isre.2019.0844.sm1.pdf [file isre.2019.0844.sm1.pdf]

**LARGE ONLINE PRODUCT CATALOG SPACE INDICATES HIGH STORE PRICE:  
UNDERSTANDING CUSTOMERS' OVERGENERALIZATION AND ILLOGICAL INFERENCE**

**Online Appendix**

Yunhui HUANG

Department of Marketing and Electronic Business, School  
of Business, Nanjing University, China 210093

[yunhuihuang@nju.edu.cn](mailto:yunhuihuang@nju.edu.cn)

Kai H. LIM

Department of Information Systems, College of Business,  
City University of Hong Kong, Hong Kong

[iskl@cityu.edu.hk](mailto:iskl@cityu.edu.hk)

Zhijie LIN

Department of Marketing and Electronic Business, School  
of Business, Nanjing University, China 210093

[dr.zhijie.lin@gmail.com](mailto:dr.zhijie.lin@gmail.com)

Shunping HAN

Department of Marketing and Electronic Business, School  
of Business, Nanjing University, China 210093

[shunpinghan@nju.edu.cn](mailto:shunpinghan@nju.edu.cn)

Appendix A. Stimulus Materials Used  
 Appendix A1. Stimulus Materials Used in Study 1

Small space condition

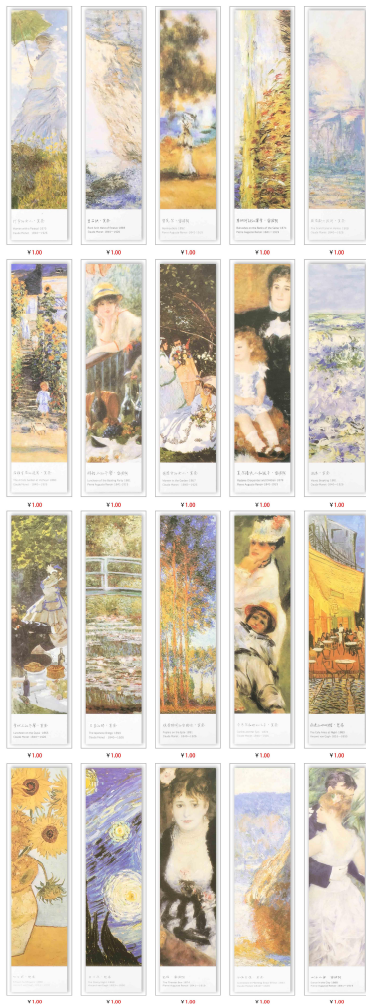

Large space condition (the upper half)

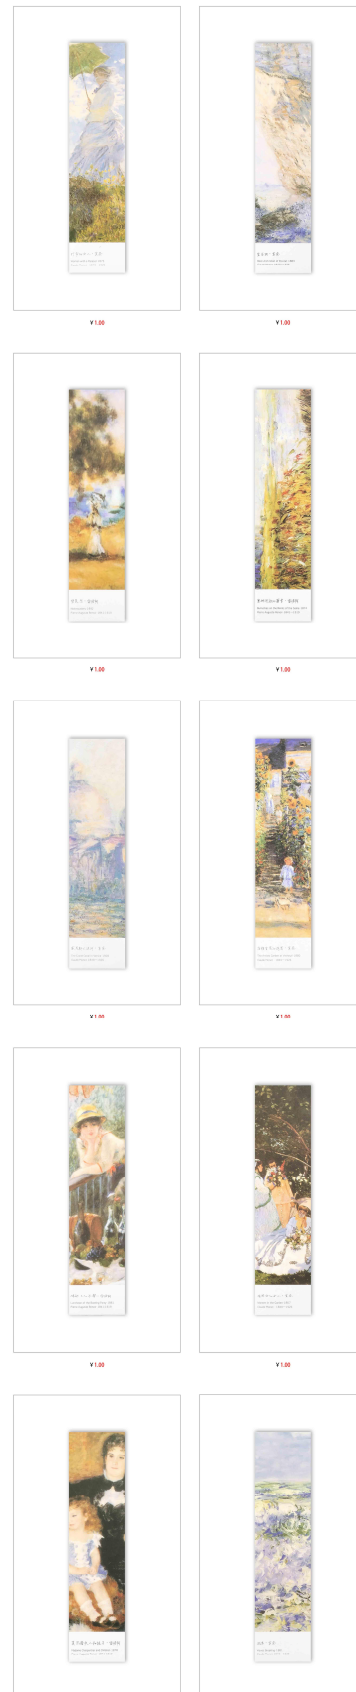

Large space condition (the lower half)

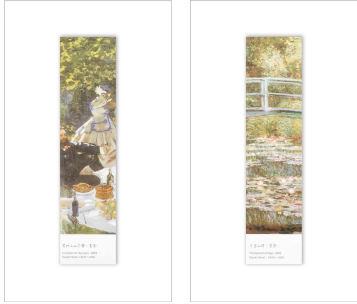

V100

V100

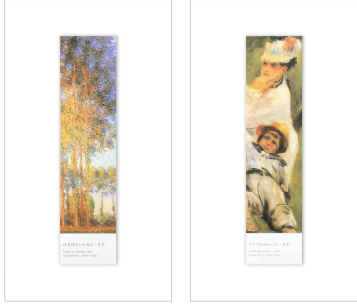

V100

V100

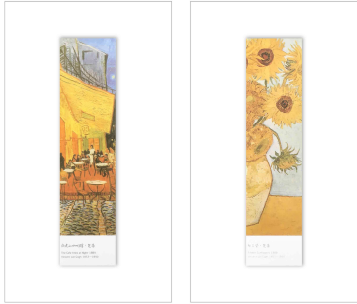

V100

V100

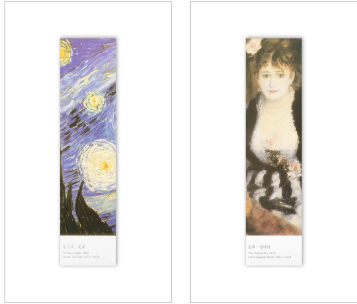

V100

V100

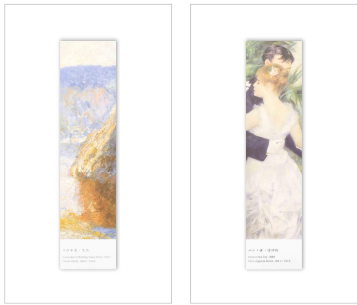

V100

V100

Appendix A2. Stimulus Materials Used in Study 2

Small space condition

Large space condition (the upper half)

All About Saving Money

All About Saving Money

|                                                                                                                                                                                                                                                        |                                                                                                                                                                                                                                                                   |                                                                                                                                                                                                                                                                   |
|--------------------------------------------------------------------------------------------------------------------------------------------------------------------------------------------------------------------------------------------------------|-------------------------------------------------------------------------------------------------------------------------------------------------------------------------------------------------------------------------------------------------------------------|-------------------------------------------------------------------------------------------------------------------------------------------------------------------------------------------------------------------------------------------------------------------|
|  <p><b>DEAL OF THE DAY</b><br/>\$329.96<br/>List: <del>\$359.96</del> (8% off)<br/>Save \$25 on Fire HD 10 Productivity Bundle<br/>This is a Great Deal</p>           |  <p><b>DEAL OF THE DAY</b><br/>\$19.99<br/>List: <del>\$39.99</del> (50% off)<br/>Epson LW-300 Labeler<br/>This is a Great Deal</p>                                              |  <p><b>DEAL OF THE DAY</b><br/>\$24.88<br/>List: <del>\$69.99</del> (64% off)<br/>Totes Women's Troy Snow Boot<br/>This is a Great Deal</p>                                      |
|  <p><b>DEAL OF THE DAY</b><br/>\$59.97<br/>List: <del>\$119.99</del> (50% off)<br/>Trek Light Gear Double Hammock with Rope Kit<br/>This is a Great Deal</p>          |  <p><b>DEAL OF THE DAY</b><br/>\$11.85<br/>List: <del>\$21.25</del> (44% off)<br/>PURELL Hand Sanitizing Wipes - Clean Refreshing Scent - 20 Count<br/>This is a Great Deal</p>  |  <p><b>DEAL OF THE DAY</b><br/>\$29.73<br/>List: <del>\$61.25</del> (42% off)<br/>GP Pro 26610 SoftPull Paper Towel Roll, White (Pack of 6)<br/>This is a Great Deal</p>         |
|  <p><b>DEAL OF THE DAY</b><br/>\$24.09<br/>List: <del>\$41.49</del> (42% off)<br/>Rubbermaid Commercial FG9S3100GRAY Brute Tote with...<br/>This is a Great Deal</p> |  <p><b>DEAL OF THE DAY</b><br/>\$13.49<br/>List: <del>\$16.99</del> (16% off)<br/>AmazonBasics Microfiber Cleaning Cloth - 24 Pack<br/>This is a Great Deal</p>                 |  <p><b>DEAL OF THE DAY</b><br/>\$8.99<br/>List: <del>\$9.99</del> (10% off)<br/>AmazonBasics 4.0 Amp Dual USB Car Charger for Apple and Android...<br/>This is a Great Deal</p> |
|  <p><b>DEAL OF THE DAY</b><br/>\$59.99<br/>List: <del>\$79.99</del> (25% off)<br/>Westinghouse Counter Top Microwave Oven<br/>This is a Great Deal</p>              |  <p><b>DEAL OF THE DAY</b><br/>\$61.59<br/>List: <del>\$399.00</del> (85% off)<br/>Save on Kattee 3-Way Women's Genuine Leather Shoulder Tote Bag<br/>This is a Great Deal</p> |  <p><b>DEAL OF THE DAY</b><br/>\$9.35<br/>List: <del>\$42.99</del> (28% off)<br/>Soft Despicable Me Minion Hat<br/>This is a Great Deal</p>                                    |
|  <p><b>DEAL OF THE DAY</b><br/>\$19.97<br/>List: <del>\$49.97</del> (60% off)<br/>Gary Majdell Spot Leather Belt<br/>This is a Great Deal</p>                       |  <p><b>DEAL OF THE DAY</b><br/>\$74.99<br/>List: <del>\$149.99</del> (50% off)<br/>BRAVEN 770 Wireless Bluetooth Speaker<br/>This is a Great Deal</p>                          |  <p><b>DEAL OF THE DAY</b><br/>\$177.97<br/>List: <del>\$487.97</del> (5% off)<br/>Save \$10 on Fire HD 8 Essentials Bundle<br/>This is a Great Deal</p>                       |

|                                                                                                                                                                                                                                                                   |                                                                                                                                                                                                                                                                    |
|-------------------------------------------------------------------------------------------------------------------------------------------------------------------------------------------------------------------------------------------------------------------|--------------------------------------------------------------------------------------------------------------------------------------------------------------------------------------------------------------------------------------------------------------------|
|  <p><b>DEAL OF THE DAY</b><br/>\$24.09<br/>List: <del>\$41.49</del> (42% off)<br/>Rubbermaid Commercial FG9S3100GRAY Brute Tote with...<br/>This is a Great Deal</p>            |  <p><b>DEAL OF THE DAY</b><br/>\$11.85<br/>List: <del>\$21.25</del> (44% off)<br/>PURELL Hand Sanitizing Wipes - Clean Refreshing Scent - 20 Count<br/>This is a Great Deal</p> |
|  <p><b>DEAL OF THE DAY</b><br/>\$8.99<br/>List: <del>\$9.99</del> (10% off)<br/>AmazonBasics 4.0 Amp Dual USB Car Charger for Apple and Android...<br/>This is a Great Deal</p> |  <p><b>DEAL OF THE DAY</b><br/>\$24.88<br/>List: <del>\$69.99</del> (64% off)<br/>Totes Women's Troy Snow Boot<br/>This is a Great Deal</p>                                     |
|  <p><b>DEAL OF THE DAY</b><br/>\$59.99<br/>List: <del>\$79.99</del> (25% off)<br/>Westinghouse Counter Top Microwave Oven<br/>This is a Great Deal</p>                        |  <p><b>DEAL OF THE DAY</b><br/>\$29.73<br/>List: <del>\$61.25</del> (42% off)<br/>GP Pro 26610 SoftPull Paper Towel Roll, White (Pack of 6)<br/>This is a Great Deal</p>      |
|  <p><b>DEAL OF THE DAY</b><br/>\$59.97<br/>List: <del>\$119.99</del> (50% off)<br/>Trek Light Gear Double Hammock with Rope Kit<br/>This is a Great Deal</p>                  |  <p><b>DEAL OF THE DAY</b><br/>\$9.35<br/>List: <del>\$42.99</del> (28% off)<br/>Soft Despicable Me Minion Hat<br/>This is a Great Deal</p>                                   |

Large space condition (the lower half)

|                                                                                                                                                                                                                                                  |                                                                                                                                                                                                                                                                      |
|--------------------------------------------------------------------------------------------------------------------------------------------------------------------------------------------------------------------------------------------------|----------------------------------------------------------------------------------------------------------------------------------------------------------------------------------------------------------------------------------------------------------------------|
|  <p><b>DEAL OF THE DAY</b><br/>\$177.97<br/>List: <del>\$187.97</del> (5% off)<br/>Save \$10 on Fire HD 8 Essentials Bundle</p> <p>This is a Great Deal</p>    |  <p><b>DEAL OF THE DAY</b><br/>\$61.50<br/>List: <del>\$399.00</del> (85% off)<br/>Save on Kattee 3-Way Women's Genuine Leather Shoulder Tote Bag</p> <p>This is a Great Deal</p> |
|  <p><b>DEAL OF THE DAY</b><br/>\$329.96<br/>List: <del>\$369.96</del> (8% off)<br/>Save \$25 on Fire HD 10 Productivity Bundle</p> <p>This is a Great Deal</p> |  <p><b>DEAL OF THE DAY</b><br/>\$13.49<br/>List: <del>\$16.99</del> (16% off)<br/>AmazonBasics Microfiber Cleaning Cloth - 24 Pack</p> <p>This is a Great Deal</p>                |
|  <p><b>DEAL OF THE DAY</b><br/>\$19.99<br/>List: <del>\$39.99</del> (50% off)<br/>Epson LW-300 Labeler</p> <p>This is a Great Deal</p>                       |  <p><b>DEAL OF THE DAY</b><br/>\$74.99<br/>List: <del>\$149.99</del> (50% off)<br/>BRAVEN 770 Wireless Bluetooth Speaker</p> <p>This is a Great Deal</p>                        |
|  <p><b>DEAL OF THE DAY</b><br/>\$19.97<br/>List: <del>\$49.97</del> (60% off)<br/>Gary Majdell Sport Leather Belt</p> <p>This is a Great Deal</p>            |                                                                                                                                                                                                                                                                      |

Appendix A3. Stimulus Materials Used in Studies 3 and 4

Small space condition

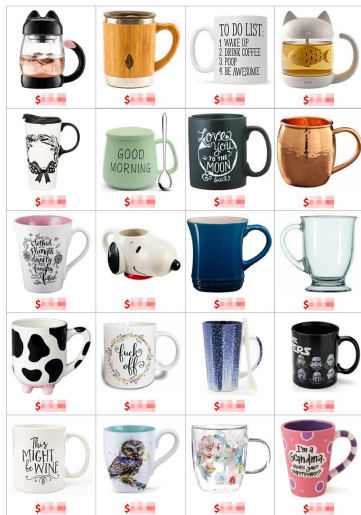

Large space condition

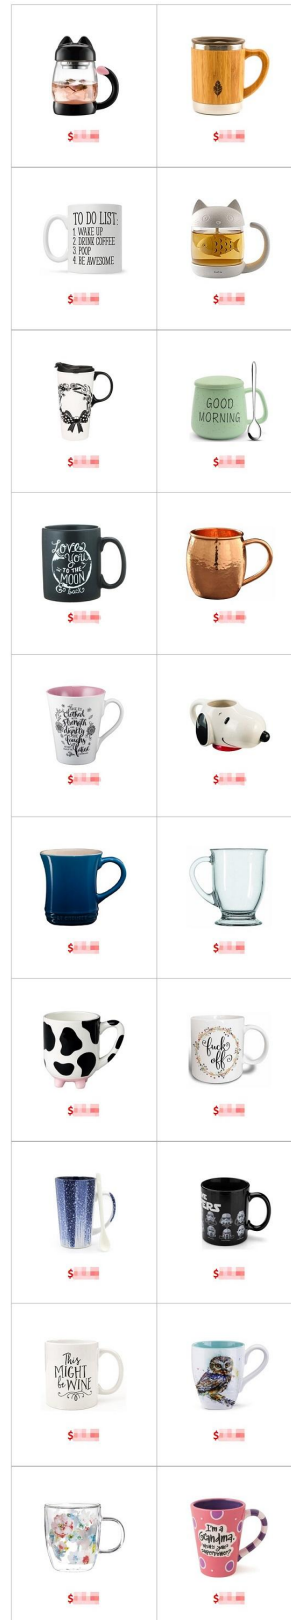

Note. The prices of mugs were masked to ensure participants did not choose their favorite mug rather than making choice simply based on the price.

#### Appendix A4. Pictures for Measuring the “Offline Large Space = High Price” Belief in Study 4

We used two pairs of pictures from Sevilla and Townsend (2016)’s online supplemental material ([http://journals.ama.org/doi/suppl/10.1509/jmr.13.0601/suppl\\_file/jmr.13.0601-web-appendix.pdf](http://journals.ama.org/doi/suppl/10.1509/jmr.13.0601/suppl_file/jmr.13.0601-web-appendix.pdf)).

Pair 1 is adopted from the space-to-product ratio manipulation for the silver stud earrings in Sevilla and Townsend (2016)’s Study 4 (please see the bottom panel on Page 7 (web appendix D) of their online supplemental material).

Pair 2 is adopted from the space-to-product ratio manipulation for the moisturizing hand cream in Sevilla and Townsend (2016)’s Study 2 (please see the bottom panel on Page 5 (web appendix C) of their online supplemental material).

Appendix A5. An Example of the Stimulus Materials Used in Study 5

Small space condition

|                                                                                                                         |                                                                                                                         |                                                                                                                         |                                                                                                                         |
|-------------------------------------------------------------------------------------------------------------------------|-------------------------------------------------------------------------------------------------------------------------|-------------------------------------------------------------------------------------------------------------------------|-------------------------------------------------------------------------------------------------------------------------|
| <br>\$34.99<br>(41% OFF MSRP \$59.00)  | <br>\$64.99<br>(35% OFF MSRP \$99.95)  | <br>\$29.99<br>(57% OFF MSRP \$69.00)  | <br>\$64.99<br>(38% OFF MSRP \$104.95) |
| <br>\$32.99<br>(33% OFF MSRP \$49.00)  | <br>\$49.99<br>(55% OFF MSRP \$110.00) | <br>\$79.99<br>(45% OFF MSRP \$145.00) | <br>\$25.99<br>(43% OFF MSRP \$45.95)  |
| <br>\$52.99<br>(44% OFF MSRP \$95.00)  | <br>\$52.99<br>(59% OFF MSRP \$130.00) | <br>\$59.99<br>(33% OFF MSRP \$89.95)  | <br>\$27.99<br>(49% OFF MSRP \$55.00)  |
| <br>\$54.99<br>(56% OFF MSRP \$110.00) | <br>\$97.75<br>(30% OFF MSRP \$140.00) | <br>\$94.99<br>(21% OFF MSRP \$120.00) | <br>\$54.99<br>(42% OFF MSRP \$95.00)  |

Large space condition

|                                                                                                                            |                                                                                                                             |
|----------------------------------------------------------------------------------------------------------------------------|-----------------------------------------------------------------------------------------------------------------------------|
| <br>\$52.99<br>(44% OFF MSRP \$95.00)    | <br>\$52.99<br>(59% OFF MSRP \$130.00)   |
| <br>\$59.99<br>(33% OFF MSRP \$89.95)    | <br>\$27.99<br>(49% OFF MSRP \$55.00)    |
| <br>\$54.99<br>(56% OFF MSRP \$110.00)   | <br>\$97.75<br>(30% OFF MSRP \$140.00)   |
| <br>\$94.99<br>(21% OFF MSRP \$120.00) | <br>\$54.99<br>(42% OFF MSRP \$95.00)  |
| <br>\$34.99<br>(41% OFF MSRP \$59.00)  | <br>\$64.99<br>(35% OFF MSRP \$99.95)  |
| <br>\$29.99<br>(57% OFF MSRP \$69.00)  | <br>\$64.99<br>(38% OFF MSRP \$104.95) |
| <br>\$32.99<br>(33% OFF MSRP \$49.00)  | <br>\$49.99<br>(55% OFF MSRP \$110.00) |
| <br>\$79.99<br>(45% OFF MSRP \$145.00) | <br>\$25.99<br>(43% OFF MSRP \$45.95)  |

## Appendix B. The Effect of Treatments on Control Variables

As shown in the Appendix Tables B1 to B3 below, the experimental manipulations did not affect the control variables.

### Appendix B1. The Effect of Space on Control Variables (Study 1)

| Control variables                | Large space | Small space | F(1,119) | p     |
|----------------------------------|-------------|-------------|----------|-------|
| Helpfulness                      | 3.83 (1.19) | 3.77 (0.98) | 0.08     | 0.777 |
| Attractiveness                   | 3.31 (1.41) | 3.50 (1.42) | 0.57     | 0.450 |
| Attention to the design features | 3.44 (1.50) | 3.50 (1.50) | 0.05     | 0.828 |
| Assortment of products           | 2.37 (1.20) | 2.45 (0.97) | 0.16     | 0.692 |

### Appendix B2. The Effect of Space and Reminder on Control Variables (Study 2)

| Control variables |                  | Large space | Small space | F (1, 439) | p     | Interaction |
|-------------------|------------------|-------------|-------------|------------|-------|-------------|
| Quality           | Without reminder | 4.21 (1.79) | 4.20 (1.28) | 0.00       | 0.953 | $F = .02$   |
|                   | With reminder    | 4.31 (0.95) | 4.34 (1.17) | 0.03       | 0.874 | $p = .877$  |
| Cost              | Without reminder | 3.42 (1.32) | 3.49 (1.31) | 0.15       | 0.698 | $F = .21$   |
|                   | With reminder    | 3.35 (1.36) | 3.53 (1.21) | 1.00       | 0.318 | $p = .648$  |

### Appendix B3. The Effect of Space and Design Knowledge on Control Variables (Study 3)

| Control variables |                 | Coef.  | Std. Err. | t     | p     | [95% Conf. Interval] |        |
|-------------------|-----------------|--------|-----------|-------|-------|----------------------|--------|
| Positioning       | Gender          | -0.010 | 0.006     | -1.85 | 0.065 | -0.021               | 0.001  |
|                   | Age             | -0.123 | 0.069     | -1.78 | 0.075 | -0.258               | 0.013  |
|                   | Space           | -0.008 | 0.066     | -0.12 | 0.901 | -0.138               | 0.121  |
|                   | Knowledge       | 0.056  | 0.048     | 1.16  | 0.247 | -0.039               | 0.150  |
|                   | Space*knowledge | -0.055 | 0.048     | -1.15 | 0.252 | -0.148               | 0.039  |
|                   | _Cons           | 4.323  | 0.069     | 63.1  | 0.000 | 4.188                | 4.458  |
| Design            | Gender          | -0.009 | 0.006     | -1.41 | 0.159 | -0.021               | 0.004  |
|                   | Age             | -0.195 | 0.078     | -2.5  | 0.013 | -0.348               | -0.042 |
|                   | Space           | -0.006 | 0.075     | -0.09 | 0.931 | -0.153               | 0.140  |
|                   | Knowledge       | 0.125  | 0.054     | 2.3   | 0.022 | 0.018                | 0.231  |
|                   | Space*knowledge | -0.065 | 0.054     | -1.21 | 0.227 | -0.171               | 0.041  |
|                   | _Cons           | 4.365  | 0.078     | 56.25 | 0.000 | 4.213                | 4.518  |
| Cost              | Gender          | -0.007 | 0.005     | -1.24 | 0.217 | -0.017               | 0.004  |
|                   | Age             | 0.049  | 0.066     | 0.73  | 0.464 | -0.082               | 0.179  |
|                   | Space           | 0.003  | 0.064     | 0.05  | 0.962 | -0.122               | 0.128  |
|                   | Knowledge       | 0.069  | 0.046     | 1.49  | 0.137 | -0.022               | 0.160  |
|                   | Space*knowledge | -0.017 | 0.046     | -0.37 | 0.714 | -0.107               | 0.074  |
|                   | _Cons           | 3.486  | 0.066     | 52.68 | 0.000 | 3.356                | 3.616  |

Appendix C. Tests for Distributional Assumption for Parametric Tests

As shown in the Appendix Tables C1 & C2 below, the values for skewness and kurtosis are all between -2 and +2, which are considered acceptable for parametric tests (Field, 2009; Trochim & Donnelly, 2001).

Appendix C1. Skewness and Kurtosis for Studies 1 and 2

|         |                  |                                  | Large space |          | Small space |          |
|---------|------------------|----------------------------------|-------------|----------|-------------|----------|
|         |                  |                                  | Skewness    | Kurtosis | Skewness    | Kurtosis |
| Study 1 |                  | Price                            | 0.65        | -0.15    | 0.56        | -0.44    |
|         |                  | Crowdedness                      | 0.14        | -0.49    | 0.11        | -0.27    |
|         |                  | Helpfulness                      | -0.23       | -0.25    | -0.06       | -0.73    |
|         |                  | Attractiveness                   | 0.24        | -1.05    | 0.14        | -1.10    |
|         |                  | Attention to the design features | -0.01       | -0.98    | 0.47        | -0.60    |
|         |                  | Assortment                       | 0.71        | 0.26     | 0.09        | -0.43    |
| Study 2 | Without reminder | Price                            | 0.34        | 0.08     | -0.16       | 0.33     |
|         |                  | Quality                          | -0.29       | 0.38     | -0.51       | -0.05    |
|         |                  | Cost                             | 0.26        | -0.19    | 0.65        | 0.42     |
|         | With reminder    | Price                            | 0.04        | -0.34    | 0.26        | 0.15     |
|         |                  | Quality                          | -0.05       | -0.48    | -0.13       | 0.72     |
|         |                  | Cost                             | 0.34        | -0.32    | 0.34        | -0.07    |

Appendix C2. Skewness and Kurtosis for Pretests of Studies 2 to 5

|                               |                                          | Large space |          | Small space |          |
|-------------------------------|------------------------------------------|-------------|----------|-------------|----------|
|                               |                                          | Skewness    | Kurtosis | Skewness    | Kurtosis |
| Pretest for Study 2           | crowdedness                              | 0.19        | -0.74    | -0.05       | -1.16    |
|                               | helpfulness                              | 0.34        | -1.06    | -0.75       | 0.33     |
|                               | attractiveness                           | 0.69        | -0.32    | 0.00        | -0.72    |
|                               | drawing attention to the design features | 0.38        | -0.18    | 0.46        | -0.30    |
|                               | assortment                               | -0.88       | 0.61     | -0.46       | -0.70    |
| Pretest for Study 3 & Study 4 | crowdedness                              | 0.05        | -0.56    | -0.21       | -0.97    |
|                               | helpfulness                              | -0.24       | -0.37    | -0.05       | 0.95     |
|                               | attractiveness                           | -0.07       | -1.16    | -0.36       | -0.05    |
|                               | drawing attention to the design features | 0.26        | -1.26    | -0.38       | -0.75    |
|                               | assortment                               | -0.42       | -0.48    | -1.11       | 0.72     |
| Pretest for Study 5           | crowdedness                              | 0.14        | -0.66    | -0.60       | -0.65    |
|                               | helpfulness                              | -0.77       | 1.01     | -0.27       | -0.43    |
|                               | attractiveness                           | 0.25        | -0.48    | 1.00        | 0.52     |
|                               | drawing attention to the design features | 0.41        | -0.39    | 0.88        | 0.34     |
|                               | assortment                               | -0.57       | -0.12    | -0.16       | -0.76    |

## Appendix D. Robustness Tests Using Regressions

### Study 1

As shown in Appendix D1.1 and D1.2, using robust t statistics and bootstrapping in the regression again confirmed that participants tended to perceive higher level of price when the online product catalog had more space.

#### Appendix D1.1. Robust t Statistics for the Regression (Study 1)

| Variables                        | Coef.  | Robust Std. Err. | t     | p     | [95% Conf. Interval] |       |
|----------------------------------|--------|------------------|-------|-------|----------------------|-------|
| Gender                           | -0.002 | 0.214            | -0.01 | 0.991 | -0.427               | 0.422 |
| Age                              | -0.003 | 0.037            | -0.09 | 0.929 | -0.076               | 0.069 |
| Helpfulness                      | -0.128 | 0.114            | -1.12 | 0.266 | -0.353               | 0.098 |
| Attractiveness                   | 0.020  | 0.090            | 0.22  | 0.826 | -0.159               | 0.199 |
| Attention to the design features | 0.129  | 0.094            | 1.38  | 0.171 | -0.057               | 0.315 |
| Assortment of products           | 0.126  | 0.111            | 1.13  | 0.261 | -0.095               | 0.346 |
| Space                            | 0.461  | 0.211            | 2.18  | 0.031 | 0.043                | 0.879 |
| _Cons                            | 2.332  | 0.961            | 2.43  | 0.017 | 0.427                | 4.236 |

#### Appendix D1.2. Bootstrapping for the Regression (Study 1)

| Variables                        | Observed coef. | Bootstrap Std. Err. | z     | p     | [95% Conf. Interval] |       |
|----------------------------------|----------------|---------------------|-------|-------|----------------------|-------|
| Gender                           | -0.002         | 0.225               | -0.01 | 0.992 | -0.444               | 0.439 |
| Age                              | -0.003         | 0.038               | -0.09 | 0.931 | -0.078               | 0.071 |
| Helpfulness                      | -0.128         | 0.124               | -1.03 | 0.305 | -0.371               | 0.116 |
| Attractiveness                   | 0.020          | 0.107               | 0.19  | 0.852 | -0.189               | 0.229 |
| Attention to the design features | 0.129          | 0.090               | 1.43  | 0.153 | -0.048               | 0.306 |
| Assortment                       | 0.126          | 0.103               | 1.22  | 0.221 | -0.075               | 0.327 |
| Space                            | 0.461          | 0.211               | 2.19  | 0.029 | 0.048                | 0.874 |
| _Cons                            | 1.871          | 0.982               | 1.91  | 0.057 | -0.053               | 3.795 |

## Study 2

As shown in Appendix D2.1 and D2.2, using robust t statistics and bootstrapping in the regression again confirmed that the effect of space was moderated by the reminder of offline-online difference.

Appendix D2.1. Robust t Statistics for the Regression (Study 2)

| Variables      | Coef.  | Robust Std. Err. | t     | p     | [95% Conf. Interval] |        |
|----------------|--------|------------------|-------|-------|----------------------|--------|
| Gender         | 0.093  | 0.108            | 0.87  | 0.385 | -0.118               | 0.305  |
| Age            | 0.013  | 0.004            | 2.91  | 0.004 | 0.004                | 0.021  |
| Quality        | 0.336  | 0.057            | 5.88  | 0.000 | 0.224                | 0.449  |
| Cost           | 0.064  | 0.048            | 1.34  | 0.180 | -0.030               | 0.159  |
| Space          | 0.306  | 0.143            | 2.13  | 0.033 | 0.024                | 0.588  |
| Reminder       | 0.599  | 0.318            | 1.88  | 0.060 | -0.026               | 1.224  |
| Space*reminder | -0.459 | 0.211            | -2.18 | 0.030 | -0.873               | -0.045 |
| _Cons          | 1.251  | 0.359            | 3.49  | 0.001 | 0.546                | 1.957  |

Appendix D2.2. Bootstrapping for the Regression (Study 2)

| Variables      | Observed coef. | Bootstrap Std. Err. | z     | p     | [95% Conf. Interval] |        |
|----------------|----------------|---------------------|-------|-------|----------------------|--------|
| Gender         | 0.093          | 0.115               | 0.81  | 0.415 | -0.131               | 0.318  |
| Age            | 0.013          | 0.004               | 3.21  | 0.001 | 0.005                | 0.020  |
| Quality        | 0.336          | 0.056               | 6.04  | 0.000 | 0.227                | 0.445  |
| Cost           | 0.064          | 0.049               | 1.30  | 0.192 | -0.032               | 0.161  |
| Space          | 0.306          | 0.125               | 2.44  | 0.014 | 0.061                | 0.552  |
| Reminder       | 0.599          | 0.333               | 1.80  | 0.072 | -0.055               | 1.252  |
| Space*reminder | -0.459         | 0.209               | -2.19 | 0.028 | -0.868               | -0.049 |
| _Cons          | 1.251          | 0.349               | 3.59  | 0.000 | 0.568                | 1.934  |

### Study 3

As shown in Appendix D3.1 and D3.2, using robust t statistics and bootstrapping in the regression again confirmed that the effect of space was moderated by the web design knowledge.

Appendix D3.1. Robust t Statistics for the Regression (Study 3)

| Variables       | Coef.  | Robust Std. Err. | t     | p     | [95% Conf. Interval] |        |
|-----------------|--------|------------------|-------|-------|----------------------|--------|
| Gender          | -0.068 | 0.049            | -1.38 | 0.167 | -0.164               | 0.028  |
| Age             | 0.001  | 0.004            | 0.29  | 0.773 | -0.007               | 0.009  |
| Positioning     | 0.478  | 0.046            | 10.32 | 0.000 | 0.386                | 0.569  |
| Design          | -0.040 | 0.039            | -1.01 | 0.311 | -0.117               | 0.037  |
| Cost            | 0.001  | 0.044            | 0.02  | 0.983 | -0.085               | 0.087  |
| Space           | 0.075  | 0.043            | 1.74  | 0.083 | -0.010               | 0.160  |
| Knowledge       | -0.028 | 0.035            | -0.79 | 0.427 | -0.096               | 0.041  |
| Space*knowledge | -0.087 | 0.034            | -2.52 | 0.012 | -0.154               | -0.019 |
| _Cons           | 4.267  | 0.048            | 89.16 | 0.000 | 4.173                | 4.362  |

Appendix D3.2. Bootstrapping for the Regression (Study 3)

| Variables       | Observed coef. | Bootstrap Std. Err. | z     | p     | [95% Conf. Interval] |        |
|-----------------|----------------|---------------------|-------|-------|----------------------|--------|
| Gender          | -0.068         | 0.049               | -1.37 | 0.171 | -0.164               | 0.029  |
| Age             | 0.001          | 0.004               | 0.30  | 0.763 | -0.006               | 0.009  |
| Positioning     | 0.478          | 0.042               | 11.50 | 0.000 | 0.396                | 0.559  |
| Design          | -0.040         | 0.043               | -0.93 | 0.353 | -0.124               | 0.044  |
| Cost            | 0.001          | 0.043               | 0.02  | 0.983 | -0.083               | 0.084  |
| Space           | 0.075          | 0.047               | 1.60  | 0.111 | -0.017               | 0.167  |
| Knowledge       | -0.028         | 0.033               | -0.84 | 0.402 | -0.092               | 0.037  |
| Space*knowledge | -0.087         | 0.032               | -2.73 | 0.006 | -0.149               | -0.025 |
| _Cons           | 4.267          | 0.055               | 78.26 | 0.000 | 4.161                | 4.374  |

### Study 4

As shown in Appendix D4.1 and D4.2, using robust t statistics and bootstrapping in the regression again confirmed that the effect of space was moderated by the belief of “offline large space = high price”.

Appendix D4.1. Robust t Statistics for the Regression (Study 4)

| Variables      | Coef.  | Robust Std. Err. | t     | p     | [95% Conf. Interval] |        |
|----------------|--------|------------------|-------|-------|----------------------|--------|
| Gender         | -0.138 | 0.052            | -2.65 | 0.008 | -0.240               | -0.036 |
| Age            | -0.002 | 0.004            | -0.42 | 0.671 | -0.010               | 0.006  |
| Space          | 0.137  | 0.049            | 2.78  | 0.006 | 0.040                | 0.234  |
| Offline belief | 0.045  | 0.043            | 1.04  | 0.299 | -0.040               | 0.130  |
| Space*belief   | 0.098  | 0.043            | 2.29  | 0.023 | 0.014                | 0.182  |
| _Cons          | 4.277  | 0.052            | 81.88 | 0.000 | 4.174                | 4.379  |

Appendix D4.2. Bootstrapping for the Regression (Study 4)

| Variables      | Observed coef. | Bootstrap Std. Err. | z     | p     | [95% Conf. Interval] |        |
|----------------|----------------|---------------------|-------|-------|----------------------|--------|
| Gender         | -0.138         | 0.043               | -3.24 | 0.001 | -0.221               | -0.054 |
| Age            | -0.002         | 0.004               | -0.47 | 0.642 | -0.009               | 0.006  |
| Space          | 0.137          | 0.046               | 3     | 0.003 | 0.047                | 0.227  |
| Offline belief | 0.045          | 0.043               | 1.05  | 0.296 | -0.039               | 0.129  |
| Space*belief   | 0.098          | 0.042               | 2.35  | 0.019 | 0.016                | 0.179  |
| _Cons          | 4.277          | 0.048               | 89.46 | 0.000 | 4.183                | 4.370  |

## Study 5

As shown in Appendix D5.1 and D5.2, using robust t statistics and bootstrapping in the regression again confirmed that the effect of space on store evaluation was moderated by the quality-price weighting, which was further qualified by the web design knowledge.

Appendix D5.1. Robust t Statistics for the Regression (Study 5)

| Variables             | Coef.  | Robust Std. Err. | t     | p     | [95% Conf. Interval] |        |
|-----------------------|--------|------------------|-------|-------|----------------------|--------|
| order                 | -0.006 | 0.067            | -0.08 | 0.933 | -0.138               | 0.127  |
| gender                | -0.088 | 0.069            | -1.27 | 0.205 | -0.224               | 0.048  |
| age                   | 0.013  | 0.006            | 2.02  | 0.044 | 0.000                | 0.026  |
| space                 | 0.103  | 0.067            | 1.54  | 0.124 | -0.028               | 0.234  |
| weighting             | 0.022  | 0.036            | 0.6   | 0.547 | -0.049               | 0.093  |
| knowledge             | 0.185  | 0.051            | 3.67  | 0.000 | 0.086                | 0.285  |
| space*weighting       | -0.092 | 0.036            | -2.55 | 0.011 | -0.163               | -0.021 |
| space*knowledge       | 0.083  | 0.051            | 1.64  | 0.102 | -0.017               | 0.184  |
| weighting*knowledge   | 0.010  | 0.027            | 0.37  | 0.713 | -0.044               | 0.064  |
| three-way interaction | 0.058  | 0.027            | 2.11  | 0.036 | 0.004                | 0.112  |
| _cons                 | 3.762  | 0.068            | 55.23 | 0.000 | 3.628                | 3.896  |

Appendix D5.2. Bootstrapping for the Regression (Study 5)

| Variables             | Observed coef. | Bootstrap Std. Err. | z     | p     | [95% Conf. Interval] |        |
|-----------------------|----------------|---------------------|-------|-------|----------------------|--------|
| order                 | -0.006         | 0.067               | -0.08 | 0.932 | -0.136               | 0.125  |
| gender                | -0.088         | 0.079               | -1.12 | 0.264 | -0.242               | 0.066  |
| age                   | 0.013          | 0.006               | 2.06  | 0.039 | 0.001                | 0.025  |
| space                 | 0.103          | 0.071               | 1.45  | 0.147 | -0.036               | 0.242  |
| weighting             | 0.022          | 0.036               | 0.6   | 0.546 | -0.049               | 0.092  |
| knowledge             | 0.185          | 0.046               | 4.05  | 0.000 | 0.096                | 0.275  |
| space*weighting       | -0.092         | 0.042               | -2.21 | 0.027 | -0.174               | -0.010 |
| space*knowledge       | 0.083          | 0.053               | 1.58  | 0.115 | -0.020               | 0.187  |
| weighting*knowledge   | 0.010          | 0.028               | 0.35  | 0.724 | -0.046               | 0.066  |
| three-way interaction | 0.058          | 0.025               | 2.35  | 0.019 | 0.009                | 0.106  |
| _cons                 | 3.762          | 0.065               | 58.23 | 0.000 | 3.635                | 3.888  |

### References:

- Field, A. (2009). *Discovering statistics using spss*. London: Sage publications.
- Sevilla, J., and Townsend, C. (2016). The Space-to Product Ratio Effect: How Interstitial Space Influences Product Aesthetic Appeal, Store Perceptions and Product Preference, *Journal of Marketing Research* (53:5), pp. 665-681.
- Trochim, W. M., & Donnelly, J. P. (2001). *Research methods knowledge base* (3 ed.). Cincinnati, OH: Atomic Dog.
